# Supplementary material for: Effectiveness of an Innovative Sensory Approach to Improve Children’s Nutritional Choices
Source: MDPI journal article supplement (doi:10.3390/ijerph18126462), 2021-06-15
Supplement: s1 [file s1]

## SUPPLEMENTARY MATERIALS-S1

### SECTION S1.1 Methods of carrying out the theoretical and practical lessons.

#### S1.1.1 Activity sequence in the classroom

- 1) Produce a billboard to hang in the classroom for scoring. In table 1, data assigned to each activity are indicated.
- 2) Each class was divided into two teams. Then, there was the assignment of team leaders drawing the two foremen to refer to the answers during the games
- 3) Having the nursery rhyme repeat to each team and score
- 4) Start of the laboratories and score the each team
- 5) Subsequently, teachers continued the classroom activities with three additional laboratories for three months following the study:

- Art image with fruit
- Art the image with the vegetable
- Sciences, in which children have seen how to make ricotta and yogurt from milk

Moreover, in June 2017, the world of the Govut was brought to the stage with a theatrical performance at the end of the year, in which children of all sample classes took part.

|                   |           |
|-------------------|-----------|
| Doggerel          | 6 points  |
| Olfattando        | 15 points |
| Investigator hand | 15 points |
| Saporando         | 9 points  |
| Apple theorem     | 15 points |
| Publicity         | 10 points |
| RefectoryDoggerel | 30 points |

**Table S1.** List of different laboratories and the score assigned for each activity.

### **S1.1.2 Main laboratory activities**

- Doggerel: A very important moment was to teach the students a nursery rhyme about the right behavior at the table, which was repeated in class every day. 6 points were awarded to be placed immediately on the board.
- Olfattando: Children had to recognize five object's smells between spices and foods and, then, match the appropriate adjective of the *vocabulario* among the terms of OLFAT. Five plastic cups were used to cover with aluminum foil and perforate on the surface, so as not to show the contents. For each correct answer 1 point was awarded and for each correct adjective 2 points were awarded, for a total of 15 points.
  1. pepper, eg. adjective pungent
  2. basil, eg. adjective aromatic
  3. garlic, eg. adjective intense
  4. anchovies, eg. adjective unpalatable
  5. cinnamon, eg. adjective spicy.
- Investigator hand: children had to guess the box's contents by touching five objects and, then, match the appropriate adjective of the *vocabulario* among the terms of TATTONE. Five dark boxes were used to not show the contents, in which children put their hand and guessed the contents, even blindfolded. For each correct answer 1 point was awarded and for each correct adjective 2 points were awarded, for a total of 15 points.
  1. dried prunes, eg. adjective sticky
  2. celery, eg. adjective smooth
  3. tangerine, eg. adjective wrinkled

4. carrot, eg. adjective scratchy

5. fennel, eg. adjective filamentous.

- Saporando: children were blindfolded and tasted 3 foods. The task was to recognize the food and attribute the appropriate adjective of the *vocabulario* among the terms of GUSTINO. For each correct answer 1 point was awarded and for each correct adjective, 2 points were awarded, for a total of 9 points. In this game the “tasting cards” of the Educat®Method were used.

1. fennel, eg. adjective sweet, fresh

2. radish, eg. adjective spicy

3. walnut, eg. adjective hard.

- Apple theorem: five types of apples were used. The characteristics of each apple have been illustrated. Afterwards, children had to recognize them tasting the different types of apples. Apples have been cut and placed in food bags. For each correct answer 1 point was awarded and for each correct adjective 2 points were awarded, for a total of 15 points

1. red apple

2. smith apple

3. annurca apple

4. golden apple

5. pink lady apple.

- Vegetables championship: the game was performed during lunch in the school refractory, organizing it with the operators involved. The championship has been divided into three days.

The first two days children awarded a winner among the vegetables in the race, proclaiming the semi-finalists. The voting took place by distributing to the children cards

with the reference vegetable. Each child has therefore voted putting in a box the most appreciated vegetables.

1. green beans vs cauliflower
2. spinach vs eggplant
3. the final: win the best.

### **S1.1.3 Example of the nursery rhyme**

“Poesia & Pulizia”

Apri bene il rubinetto  
 senza bagnare il tuo giacchetto  
 Insapona le manine  
 che pulite son più carine  
 Sfrega i palmi tra di loro  
 brilleranno come l'oro  
 Passa bene tra le dita  
 la tua mano sarà più pulita  
 Strofinando dentro e fuori  
 si cancellano anche i colori  
 Intorno ai pollici gira bene  
 che lo sai che il Govut ci tiene  
 Sciacqua sciacqua forte e in fretta  
 c'è la cena che ti aspetta!”

## SECTION S1.2 Questionnaire

### S1.2.1 Italian version

Qui sotto troverai delle domande riguardo la tua alimentazione e le tue preferenze per i cibi. Ti assicuriamo che le risposte che darai non saranno giudicate giuste o sbagliate, né saranno fatte vedere ai tuoi genitori. Quindi, ti preghiamo di leggere tutto e di rispondere con calma e sincerità. Grazie mille!

La tua data di nascita è \_\_\_\_/\_\_\_\_/\_\_\_\_

Sei maschio o femmina? ☐ M ☐ F

Questionario A)

| <b>Rifletti e rispondi alle affermazioni seguenti:</b>            | <b>Vero</b>              | <b>Falso</b>             |
|-------------------------------------------------------------------|--------------------------|--------------------------|
| A1. Mangio soprattutto cibi ricchi e appetitosi                   | <input type="checkbox"/> | <input type="checkbox"/> |
| A2. E' molto difficile farmi variare l'alimentazione              | <input type="checkbox"/> | <input type="checkbox"/> |
| A3. Mi piace fare tanti piccoli spuntini nell'arco della giornata | <input type="checkbox"/> | <input type="checkbox"/> |
| A4. Mi piace un'alimentazione molto varia                         | <input type="checkbox"/> | <input type="checkbox"/> |
| A5. Farmi mangiare è sempre un'impresa molto difficile            | <input type="checkbox"/> | <input type="checkbox"/> |
| A6. Bado più alla quantità che alla qualità del cibo              | <input type="checkbox"/> | <input type="checkbox"/> |
| A7. Amo mangiare sempre le stesse cose                            | <input type="checkbox"/> | <input type="checkbox"/> |
| A8. Mangio soprattutto fuori pasto                                | <input type="checkbox"/> | <input type="checkbox"/> |
| A9. Mangio volentieri tutti ciò che mi danno                      | <input type="checkbox"/> | <input type="checkbox"/> |
| A10. E' necessario usare molta fantasia per stimolarmi a mangiare | <input type="checkbox"/> | <input type="checkbox"/> |

## Questionario B)

| TI PIACE                         | Molto                                                                               | Così così                                                                           | Per niente                                                                          | TI PIACE                       | Molto                                                                                 | Così così                                                                             | Per niente                                                                            |
|----------------------------------|-------------------------------------------------------------------------------------|-------------------------------------------------------------------------------------|-------------------------------------------------------------------------------------|--------------------------------|---------------------------------------------------------------------------------------|---------------------------------------------------------------------------------------|---------------------------------------------------------------------------------------|
| B01. Legumi(piselli, fagioli...) |    |    |    | B17. Banane                    |    |    |    |
| B02. Broccoli                    |    |    |    | B18. Kiwi                      |    |    |    |
| B03. Carciofi                    |    |    |    | B19. Frutti di bosco           |    |    |    |
| B04. Carote                      |    |    |    | B20. Frutta esotica            |    |    |    |
| B05. Cavolfiore                  |    |    |    | B21. Frutta secca con guscio   |    |    |    |
| B06. Pomodoro                    |  |  |  | B22. Pera/Mela                 |  |  |  |
| B07. Fagiolini                   |  |  |  | B23. Melone                    |  |  |  |
| B08. Finocchi                    |  |  |  | B24. Uva                       |  |  |  |
| B09. Funghi                      |  |  |  | B25. Albicocche<br>Pesche      |  |  |  |
| B10. Insalata                    |  |  |  | B26. Bastoncini                |  |  |  |
| B11. Peperone                    |  |  |  | B27. Gamberi/<br>Gamberetti    |  |  |  |
| B12. Patata                      |  |  |  | B28. Sogliola/Platessa         |  |  |  |
| B13. Sedano                      |  |  |  | B29. Vongole, Cozze            |  |  |  |
| B14. Spinaci                     |  |  |  | B30. Pesce:<br>trancio/filetto |  |  |  |
| B15. Zucchine                    |  |  |  | B31. Polpo Seppia              |  |  |  |

|             |                                                                                   |                                                                                   |                                                                                   |                       |                                                                                     |                                                                                     |                                                                                     |
|-------------|-----------------------------------------------------------------------------------|-----------------------------------------------------------------------------------|-----------------------------------------------------------------------------------|-----------------------|-------------------------------------------------------------------------------------|-------------------------------------------------------------------------------------|-------------------------------------------------------------------------------------|
| B16. Agrumi |  |  |  | B32. Tonno in scatola |  |  |  |
|-------------|-----------------------------------------------------------------------------------|-----------------------------------------------------------------------------------|-----------------------------------------------------------------------------------|-----------------------|-------------------------------------------------------------------------------------|-------------------------------------------------------------------------------------|-------------------------------------------------------------------------------------|

## Questionario C)

| Per favore scegli una risposta per ogni cibo o bevanda, mettendo una crocetta sul quadratino scelto | FA MOLTO BENE ALLA SALUTE | FA BENE ALLA SALUTE      | NON FA BENE              |
|-----------------------------------------------------------------------------------------------------|---------------------------|--------------------------|--------------------------|
| C01. Acqua                                                                                          | <input type="checkbox"/>  | <input type="checkbox"/> | <input type="checkbox"/> |
| C02. Bibite zuccherate (aranciata, cola, tè)                                                        | <input type="checkbox"/>  | <input type="checkbox"/> | <input type="checkbox"/> |
| C03. Biscotti                                                                                       | <input type="checkbox"/>  | <input type="checkbox"/> | <input type="checkbox"/> |
| C04. Burro                                                                                          | <input type="checkbox"/>  | <input type="checkbox"/> | <input type="checkbox"/> |
| C05. Dolciumi (caramelle, gomme)                                                                    | <input type="checkbox"/>  | <input type="checkbox"/> | <input type="checkbox"/> |
| C06. Carne                                                                                          | <input type="checkbox"/>  | <input type="checkbox"/> | <input type="checkbox"/> |
| C07. Cereali per la colazione                                                                       | <input type="checkbox"/>  | <input type="checkbox"/> | <input type="checkbox"/> |
| C08. Cioccolata - Crema di cioccolata                                                               | <input type="checkbox"/>  | <input type="checkbox"/> | <input type="checkbox"/> |
| C09. Formaggio                                                                                      | <input type="checkbox"/>  | <input type="checkbox"/> | <input type="checkbox"/> |
| C10. Frutta                                                                                         | <input type="checkbox"/>  | <input type="checkbox"/> | <input type="checkbox"/> |
| C11. Gelato                                                                                         | <input type="checkbox"/>  | <input type="checkbox"/> | <input type="checkbox"/> |
| C12. Hamburger (fast food)                                                                          | <input type="checkbox"/>  | <input type="checkbox"/> | <input type="checkbox"/> |
| C13. Latte / Yogurt                                                                                 | <input type="checkbox"/>  | <input type="checkbox"/> | <input type="checkbox"/> |
| C14. Legumi (ceci, piselli, lenticchie..)                                                           | <input type="checkbox"/>  | <input type="checkbox"/> | <input type="checkbox"/> |
| C15. Merendine                                                                                      | <input type="checkbox"/>  | <input type="checkbox"/> | <input type="checkbox"/> |
| C16. Minestrone                                                                                     | <input type="checkbox"/>  | <input type="checkbox"/> | <input type="checkbox"/> |
| C17. Olio d'oliva                                                                                   | <input type="checkbox"/>  | <input type="checkbox"/> | <input type="checkbox"/> |
| C18. Pane                                                                                           | <input type="checkbox"/>  | <input type="checkbox"/> | <input type="checkbox"/> |
| C19. Pasta, Riso                                                                                    | <input type="checkbox"/>  | <input type="checkbox"/> | <input type="checkbox"/> |

|                            |                          |                          |                          |
|----------------------------|--------------------------|--------------------------|--------------------------|
| C20. Patate                | <input type="checkbox"/> | <input type="checkbox"/> | <input type="checkbox"/> |
| C21. Patatine confezionate | <input type="checkbox"/> | <input type="checkbox"/> | <input type="checkbox"/> |
| C22. Pesce                 | <input type="checkbox"/> | <input type="checkbox"/> | <input type="checkbox"/> |
| C23. Pizza                 | <input type="checkbox"/> | <input type="checkbox"/> | <input type="checkbox"/> |
| C24. Prosciutto cotto      | <input type="checkbox"/> | <input type="checkbox"/> | <input type="checkbox"/> |
| C25. Prosciutto crudo      | <input type="checkbox"/> | <input type="checkbox"/> | <input type="checkbox"/> |
| C26. Salame/Mortadella     | <input type="checkbox"/> | <input type="checkbox"/> | <input type="checkbox"/> |
| C27. Succo di frutta       | <input type="checkbox"/> | <input type="checkbox"/> | <input type="checkbox"/> |
| C28. Torte                 | <input type="checkbox"/> | <input type="checkbox"/> | <input type="checkbox"/> |
| C29. Uova                  | <input type="checkbox"/> | <input type="checkbox"/> | <input type="checkbox"/> |
| C30. Verdura cruda         | <input type="checkbox"/> | <input type="checkbox"/> | <input type="checkbox"/> |
| C31. Verdura cotta         | <input type="checkbox"/> | <input type="checkbox"/> | <input type="checkbox"/> |
| C32. Vino                  | <input type="checkbox"/> | <input type="checkbox"/> | <input type="checkbox"/> |



### S1.2.2 English version

Below you will find questions about your diet and food preferences. We assure you that the answers you give will not be judged right or wrong, nor will they be shown to your parents. So, please read everything and respond calmly and sincerely. Thanks so much!

Your date of birth is \_\_\_\_/\_\_\_\_/\_\_\_\_

Are you male or female? ☐ M ☐ F

#### Questionnaire A)

| <b>Ponder and respond to the following statements:</b>                   | <b>True</b>              | <b>False</b>             |
|--------------------------------------------------------------------------|--------------------------|--------------------------|
| A1. I mostly eat rich and appetizing foods                               | <input type="checkbox"/> | <input type="checkbox"/> |
| A2. It is very difficult to make me vary my diet                         | <input type="checkbox"/> | <input type="checkbox"/> |
| A3. I like to have many small snacks throughout the day                  | <input type="checkbox"/> | <input type="checkbox"/> |
| A4. I like a very varied diet                                            | <input type="checkbox"/> | <input type="checkbox"/> |
| A5. Getting me to eat is always a very difficult undertaking             | <input type="checkbox"/> | <input type="checkbox"/> |
| A6. I pay more attention to the quantity than to the quality of the food | <input type="checkbox"/> | <input type="checkbox"/> |
| A7. I love to always eat the same things                                 | <input type="checkbox"/> | <input type="checkbox"/> |
| A8. I mostly eat between meals                                           | <input type="checkbox"/> | <input type="checkbox"/> |
| A9. I gladly eat everything they give me                                 | <input type="checkbox"/> | <input type="checkbox"/> |
| A10. It is necessary to use a lot of imagination to stimulate me to eat  | <input type="checkbox"/> | <input type="checkbox"/> |

#### Questionnaire B)

| <b>YOU LIKE</b>                | <b>very much</b>                                                                    | <b>So and so</b>                                                                    | <b>for nothing</b>                                                                  | <b>YOU LIKE</b> | <b>very much</b>                                                                      | <b>So and so</b>                                                                      | <b>for nothing</b>                                                                    |
|--------------------------------|-------------------------------------------------------------------------------------|-------------------------------------------------------------------------------------|-------------------------------------------------------------------------------------|-----------------|---------------------------------------------------------------------------------------|---------------------------------------------------------------------------------------|---------------------------------------------------------------------------------------|
| B01. Legumes (peas, beans ...) |  |  |  | B17. Bananas    |  |  |  |

|                    |                                                                                     |                                                                                     |                                                                                     |                           |                                                                                       |                                                                                       |                                                                                       |
|--------------------|-------------------------------------------------------------------------------------|-------------------------------------------------------------------------------------|-------------------------------------------------------------------------------------|---------------------------|---------------------------------------------------------------------------------------|---------------------------------------------------------------------------------------|---------------------------------------------------------------------------------------|
| B02. Broccoli      |    |    |    | B18. Kiwi                 |    |    |    |
| B03. Artichokes    |    |    |    | B19. Berries              |    |    |    |
| B04. Carrots       |    |    |    | B20. Esotic fruit         |    |    |    |
| B05. Cauliflower   |    |    |    | B21. Dried fruit in shell |    |    |    |
| B06. Tomato        |    |    |    | B22. Pear / Apple         |    |    |    |
| B07. Green beans   |    |    |    | B23. Melon                |    |    |    |
| B08. Fennel        |    |    |    | B24. Grapes               |    |    |    |
| B09. Mushrooms     |    |    |    | B25. Apricots / Peaches   |    |    |    |
| B10. Salad         |   |   |   | B26. Sticks               |   |   |   |
| B11. Sweet pepper  |  |  |  | B27. Shrimp / Shrimp      |  |  |  |
| B12. Potato        |  |  |  | B28. Sole / Plaice        |  |  |  |
| B13. Celery        |  |  |  | B29. Clams, / Mussels     |  |  |  |
| B14. Spinach       |  |  |  | B30. Fish: steak / fillet |  |  |  |
| B15. Zucchini      |  |  |  | B31. Octopus / Sepia      |  |  |  |
| B16. Citrus fruits |  |  |  | B32. Canned tuna          |  |  |  |

## Questionnaire C)

|                                                                                                 |                                |                         |                                        |
|-------------------------------------------------------------------------------------------------|--------------------------------|-------------------------|----------------------------------------|
| <b>Please choose an answer for each food or drink,<br/>placing a cross on the chosen square</b> | <b>IT IS<br/>VERY<br/>GOOD</b> | <b>IT'S<br/>HEALTHY</b> | <b>NOT<br/>GOOD<br/>FOR<br/>HEALTH</b> |
|-------------------------------------------------------------------------------------------------|--------------------------------|-------------------------|----------------------------------------|

|                                             | <b>FOR<br/>HEALTH</b>    |                          |                          |
|---------------------------------------------|--------------------------|--------------------------|--------------------------|
| C01. Water                                  | <input type="checkbox"/> | <input type="checkbox"/> | <input type="checkbox"/> |
| C02. Sugary drinks (orange soda, cola, tea) | <input type="checkbox"/> | <input type="checkbox"/> | <input type="checkbox"/> |
| C03. Cookies                                | <input type="checkbox"/> | <input type="checkbox"/> | <input type="checkbox"/> |
| C04. Butter                                 | <input type="checkbox"/> | <input type="checkbox"/> | <input type="checkbox"/> |
| C05. Sweets (candy, gum)                    | <input type="checkbox"/> | <input type="checkbox"/> | <input type="checkbox"/> |
| C06. Meat                                   | <input type="checkbox"/> | <input type="checkbox"/> | <input type="checkbox"/> |
| C07. Breakfast cereals                      | <input type="checkbox"/> | <input type="checkbox"/> | <input type="checkbox"/> |
| C08. Chocolate - Chocolate cream            | <input type="checkbox"/> | <input type="checkbox"/> | <input type="checkbox"/> |
| C09. Cheese                                 | <input type="checkbox"/> | <input type="checkbox"/> | <input type="checkbox"/> |
| C10. Fruit                                  | <input type="checkbox"/> | <input type="checkbox"/> | <input type="checkbox"/> |
| C11. Ice cream                              | <input type="checkbox"/> | <input type="checkbox"/> | <input type="checkbox"/> |
| C12. Hamburger (fast food)                  | <input type="checkbox"/> | <input type="checkbox"/> | <input type="checkbox"/> |
| C13. Milk / Yogurt                          | <input type="checkbox"/> | <input type="checkbox"/> | <input type="checkbox"/> |
| C14. Legumes (chickpeas, peas, lentils ..)  | <input type="checkbox"/> | <input type="checkbox"/> | <input type="checkbox"/> |
| C15. Snacks                                 | <input type="checkbox"/> | <input type="checkbox"/> | <input type="checkbox"/> |
| C16. Vegetable soap                         | <input type="checkbox"/> | <input type="checkbox"/> | <input type="checkbox"/> |
| C17. Olive oil                              | <input type="checkbox"/> | <input type="checkbox"/> | <input type="checkbox"/> |
| C18. Bread                                  | <input type="checkbox"/> | <input type="checkbox"/> | <input type="checkbox"/> |
| C19. Pasta, Rice                            | <input type="checkbox"/> | <input type="checkbox"/> | <input type="checkbox"/> |
| C20. Potatoes                               | <input type="checkbox"/> | <input type="checkbox"/> | <input type="checkbox"/> |
| C21. Potato chips                           | <input type="checkbox"/> | <input type="checkbox"/> | <input type="checkbox"/> |
| C22. Fish                                   | <input type="checkbox"/> | <input type="checkbox"/> | <input type="checkbox"/> |
| C23. Pizza                                  | <input type="checkbox"/> | <input type="checkbox"/> | <input type="checkbox"/> |

|                          |                          |                          |                          |
|--------------------------|--------------------------|--------------------------|--------------------------|
| C24. Cooked ham          | <input type="checkbox"/> | <input type="checkbox"/> | <input type="checkbox"/> |
| C25. Raw ham             | <input type="checkbox"/> | <input type="checkbox"/> | <input type="checkbox"/> |
| C26. Salami / Mortadella | <input type="checkbox"/> | <input type="checkbox"/> | <input type="checkbox"/> |
| C27. Fruit juice         | <input type="checkbox"/> | <input type="checkbox"/> | <input type="checkbox"/> |
| C28. Cakes               | <input type="checkbox"/> | <input type="checkbox"/> | <input type="checkbox"/> |
| C29. Eggs                | <input type="checkbox"/> | <input type="checkbox"/> | <input type="checkbox"/> |
| C30. Raw vegetables      | <input type="checkbox"/> | <input type="checkbox"/> | <input type="checkbox"/> |
| C31. Cooked vegetables   | <input type="checkbox"/> | <input type="checkbox"/> | <input type="checkbox"/> |
| C32. Wine                | <input type="checkbox"/> | <input type="checkbox"/> | <input type="checkbox"/> |
